# Supplementary material for: Forecasting Trends in Invasive Pneumococcal Disease among Elderly Adults in Quebec
Source: Can J Infect Dis Med Microbiol. 2017 Jan 26;2017:4347206. doi: 10.1155/2017/4347206 (PMC5299213; doi:10.1155/2017/4347206)
Supplement: Supplementary file 1 — Supplementary materials provide the detail of serotype identification in notifiable disease registry in Québec and the results of alternative models. [file 4347206.f1.pdf]

## Supplementary Material

Table S1 : Serotype identification of cases recorded in the notifiable disease registry (MADO file) in Quebec, 2000-2014

| <b>Year</b> | <b>IPD cases notified</b> | <b>IPD cases with serotype identified</b> | <b>% identification</b> |
|-------------|---------------------------|-------------------------------------------|-------------------------|
| <b>2000</b> | 86                        | 53                                        | 62%                     |
| <b>2001</b> | 86                        | 50                                        | 58%                     |
| <b>2002</b> | 90                        | 49                                        | 54%                     |
| <b>2003</b> | 113                       | 69                                        | 61%                     |
| <b>2004</b> | 152                       | 70                                        | 46%                     |
| <b>2005</b> | 111                       | 52                                        | 47%                     |
| <b>2006</b> | 83                        | 43                                        | 52%                     |
| <b>2007</b> | 101                       | 36                                        | 36%                     |
| <b>2008</b> | 120                       | 56                                        | 47%                     |
| <b>2009</b> | 162                       | 84                                        | 52%                     |
| <b>2010</b> | 162                       | 69                                        | 43%                     |
| <b>2011</b> | 125                       | 60                                        | 48%                     |
| <b>2012</b> | 149                       | 59                                        | 40%                     |
| <b>2013</b> | 162                       | 89                                        | 55%                     |
| <b>2014</b> | 177                       | 143                                       | 81%                     |

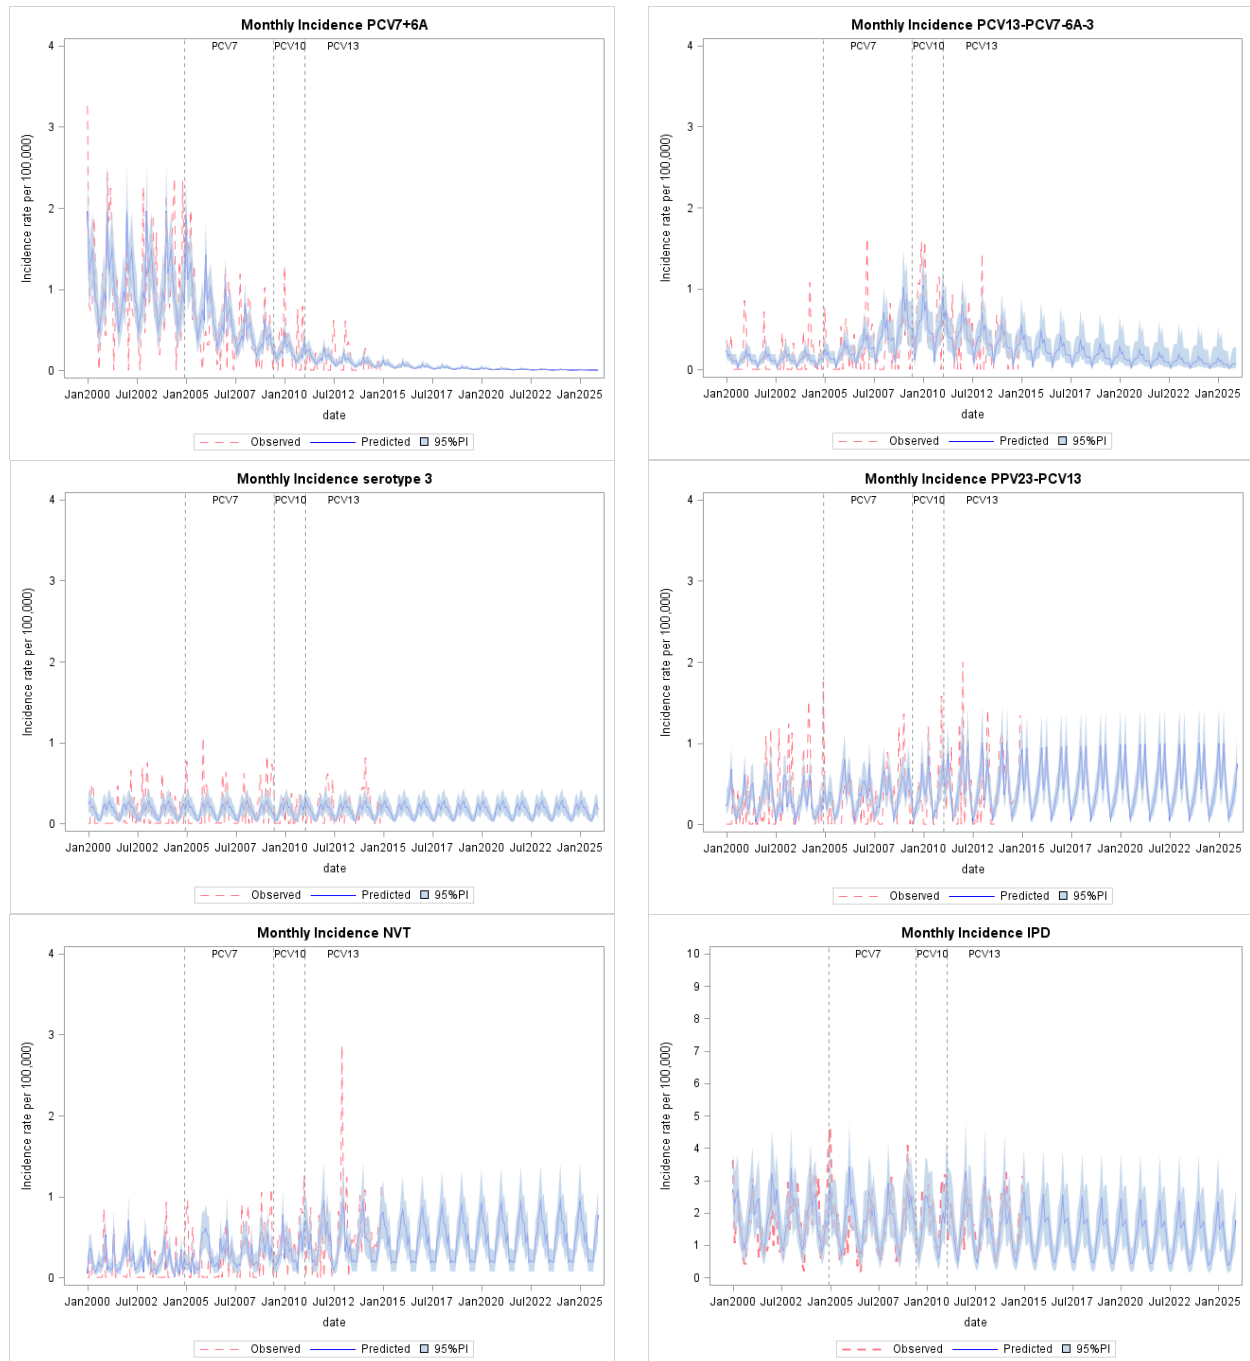

Figure S1: Observed (2000-2014) and predicted (2000-2024) monthly IPD rate by serotype category in adults 65-74 years of age in the province of Quebec, Canada, 2000-2014 (Base model).

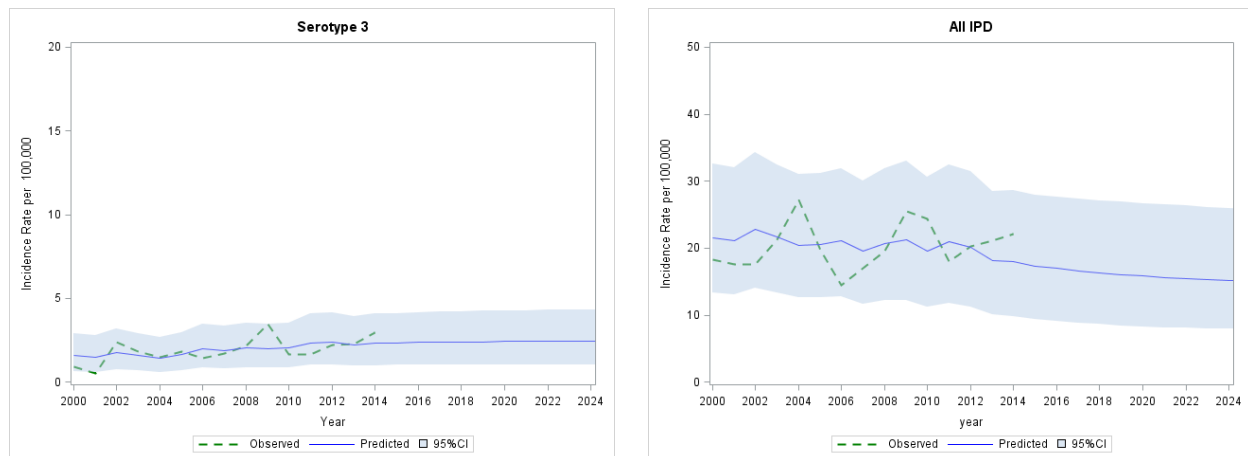

Figure S2: Observed (2000-2014) and predicted (2000-2024) monthly IPD rate by serotype category in adults 65-74 years of age in the province of Quebec, Canada, 2000-2014 (Sensitivity analysis 1: serotype 3 considered as a NVT which is positively influenced by PCV7 and PCV13 use).

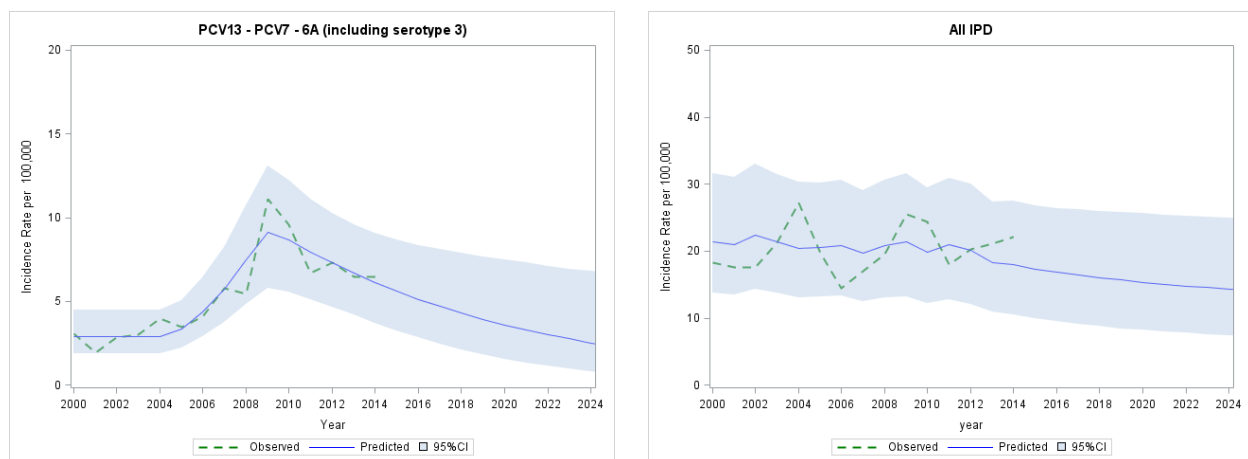

Figure S3: Observed (2000-2014) and predicted (2000-2024) monthly IPD rate by serotype category in adults 65-74 years of age in the province of Quebec, Canada, 2000-2014 (Sensitivity analysis 2: serotype 3 considered as a PCV13-7 type which is negatively influenced by PCV13 use).

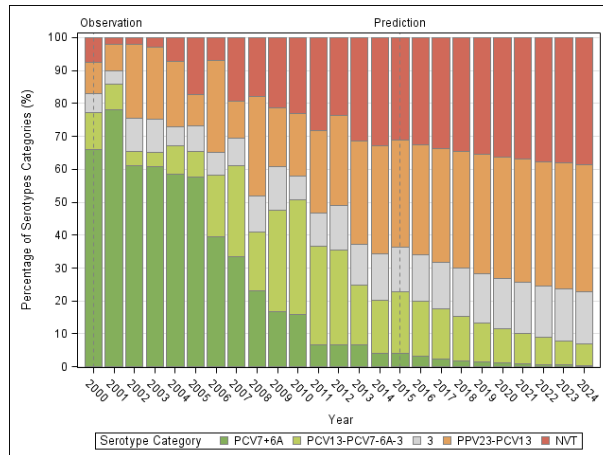

Figure S4 : Observed (2000-2014) and predicted (2015-2024) proportions of IPD cases by serotype category among adults 65 to 74 years of age, in Quebec (Sensitivity analysis 1: serotype 3 considered as a NVT which is positively influenced by PCV7 and PCV13 use).

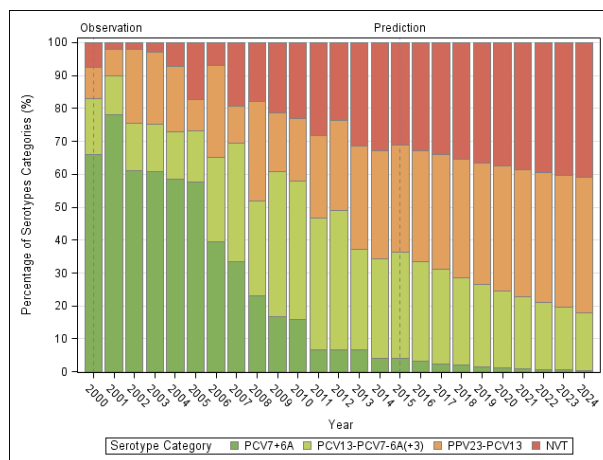

Figure S5: Observed (2000-2014) and predicted (2015-2024) proportions of IPD cases by serotype category among adults 65 to 74 years of age, in Quebec (Sensitivity analysis 2: serotype 3 considered as a PCV13-7 type which is negatively influenced by PCV13 use).
